# Supplementary material for: Inhibition of PbI2-induced defects by doping MABr for high-performance perovskite solar cells
Source: Royal Society of Chemistry journal article supplement (doi:10.1039/d2nr01626e), 2022-01-01
Supplement: d2nr01626e1.pdf [file d2nr01626e1.pdf]

## Supplementary information

# Inhibition $\text{PbI}_2$ -induced defects by doping MABr for high-performance perovskite solar cells

Yao Yao<sup>1</sup>, Mingliang Wang<sup>1</sup>, Qingrui Cai<sup>1</sup>, Dong Wei<sup>1\*</sup>

<sup>1</sup>College of Physics and energy, Fujian Normal University, FuZhou, China

\*Email of corresponding author: q397983012@126.com

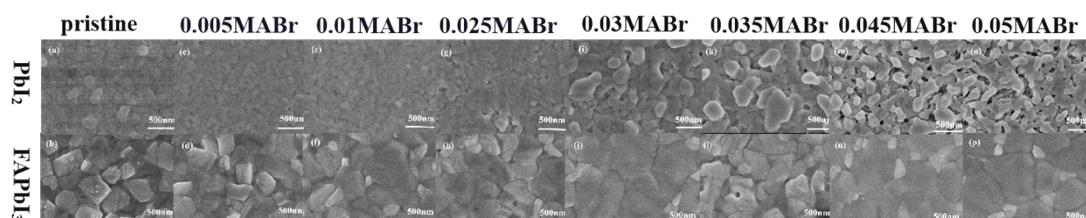

Supplementary Fig. 1. (a), (c), (e), (g), (i), (k), (m), (o) shows the SEM images of  $\text{PbI}_2$  with MABr = 0, 0.005, 0.01, 0.025, 0.03, 0.035, 0.045, 0.05; whereas Fig. 1 (b), (d), (f), (h), (j), (l), (n), (p) shows the SEM images of corresponding  $\text{FAPbI}_3$ .

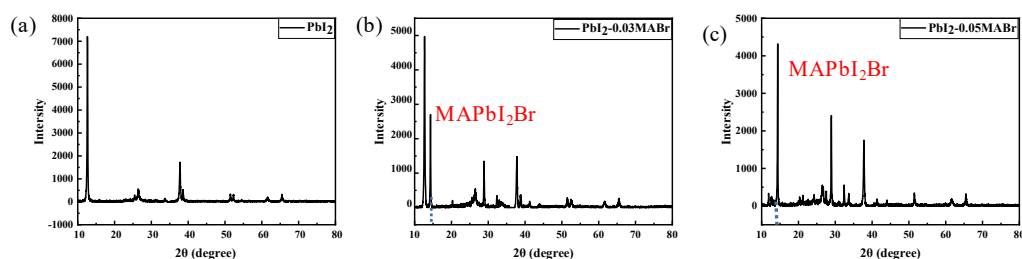

Supplementary Fig. 2. XRD patterns of (a)  $\text{PbI}_2$ ; (b)  $\text{PbI}_2$ -0.03MABr; (c)  $\text{PbI}_2$ -0.05MABr.

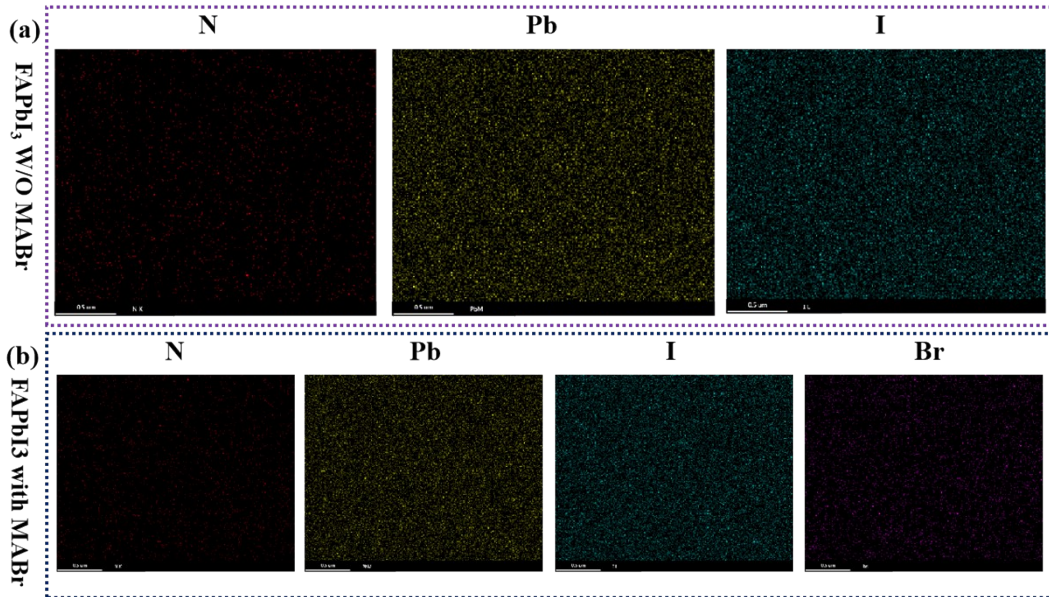

Supplementary Fig. 3. The elements distribution diagram of the FAPbI<sub>3</sub> buried face without MABr (a) and with MABr (b).

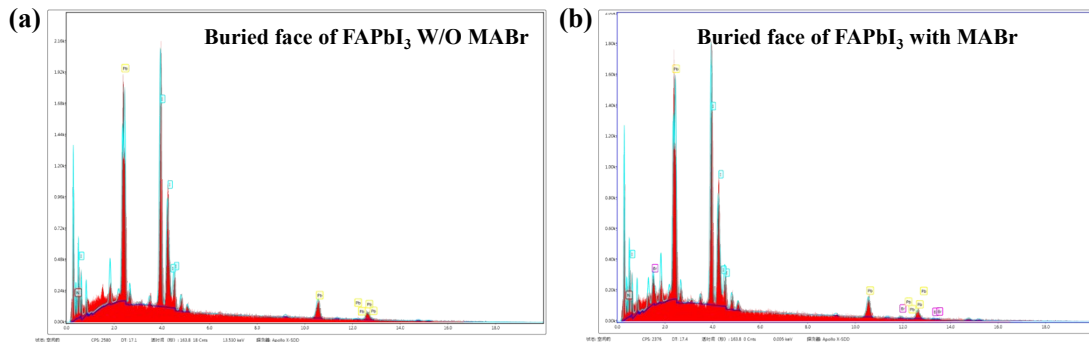

Supplementary Fig. 4. The full elements distribution spectrum of the buried face of FAPbI<sub>3</sub> (a) without and (b) with MABr.

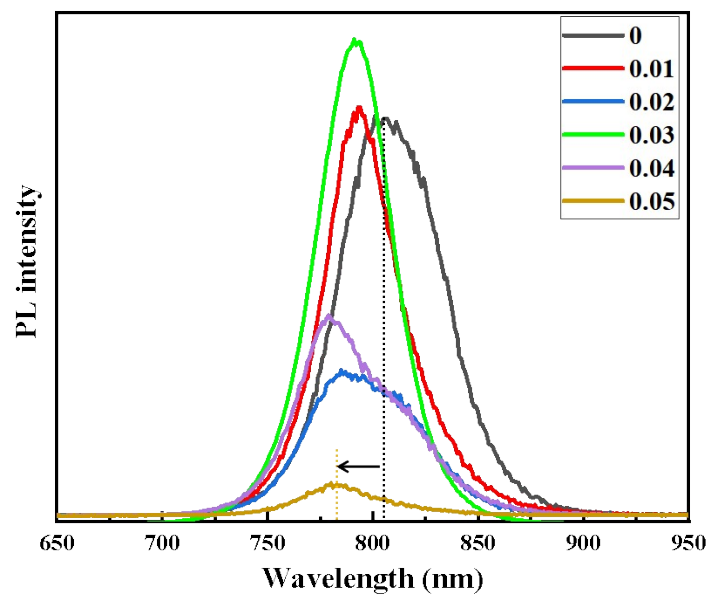

Supplementary Fig. 5. PL spectrum for FAPbI<sub>3</sub> samples with MABr from 0 to 0.05 g/ml.

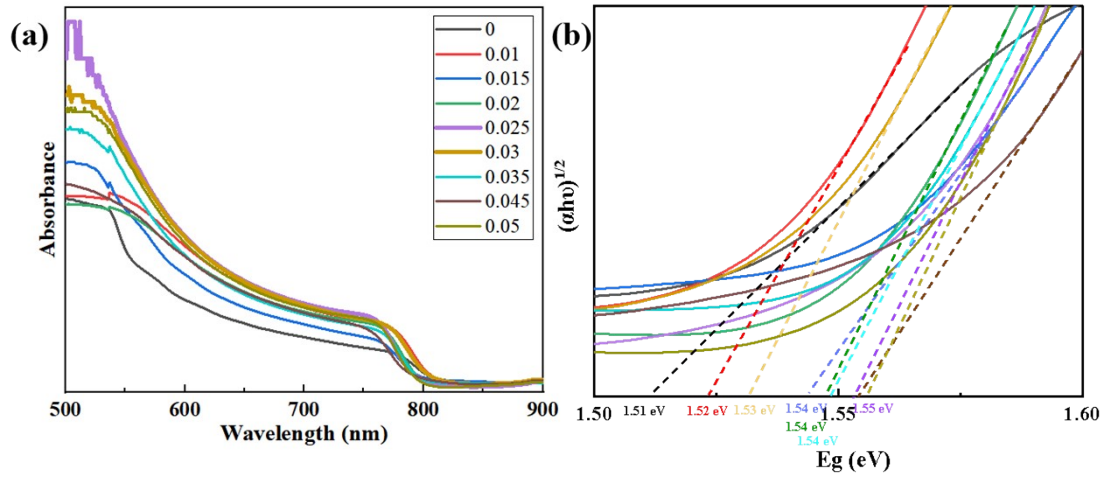

Supplementary Fig. 6. (a) Absorption spectra of as-prepared films with increasing MABr from 0 to 0.05g/ml; (b) the band gaps of these corresponding films.

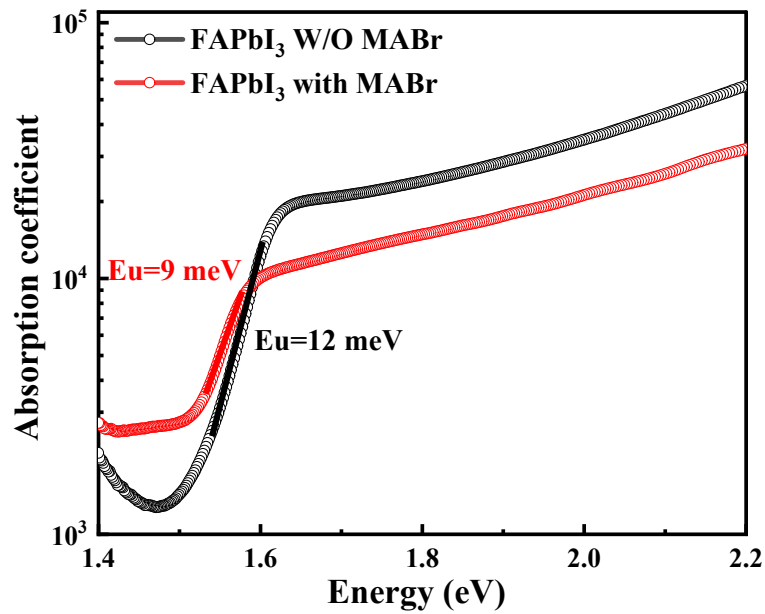

Supplementary Fig. 7. The Urbach tail energy from the Tauc plot of FAPbI<sub>3</sub> without (Black line) and with (Red line) MABr.

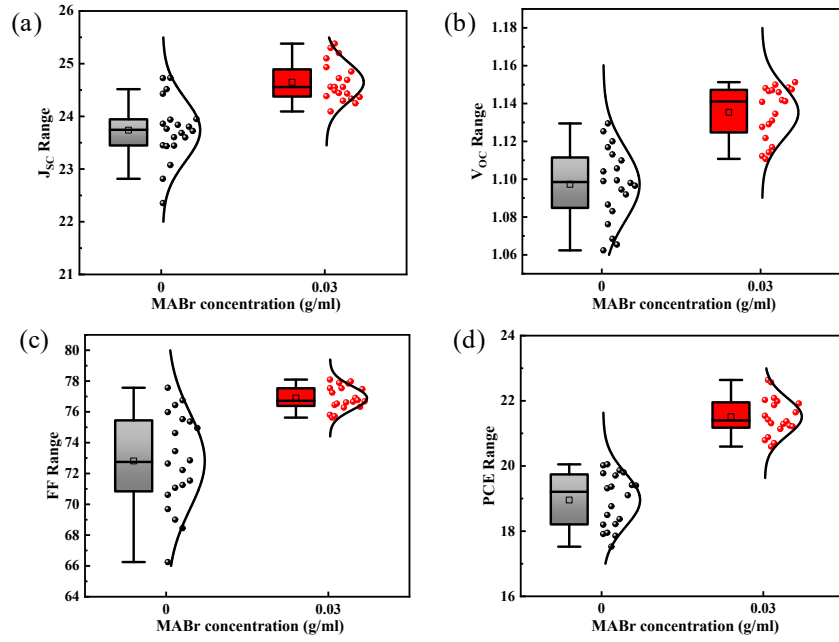

Supplementary Fig. 8. Statistical plot of FAPbI<sub>3</sub> with MABr = 0, 0.03g/ml: (a)  $J_{sc}$ ; (b)  $V_{oc}$ ; (c)  $FF$ ; (d) PCE.

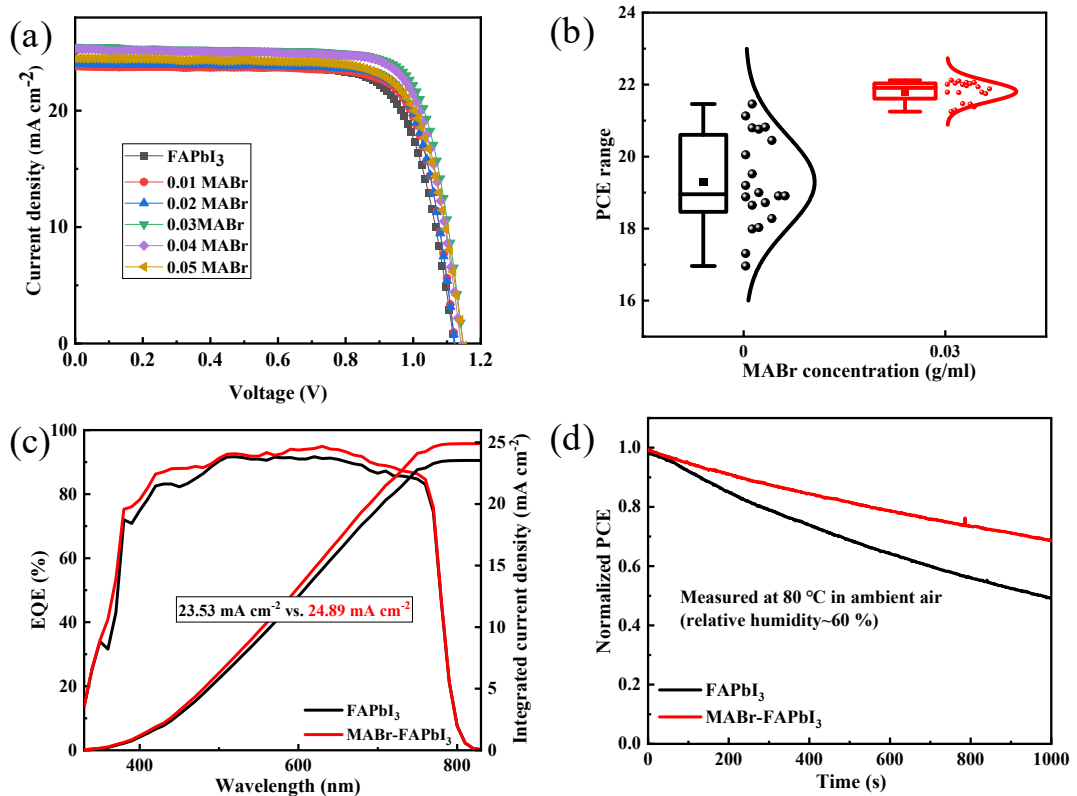

Supplementary Fig. 9. (a) Current-Voltage curves of FAPbI<sub>3</sub> under different doping concentration of MABr = 0, 0.01, 0.02, 0.03, 0.04, 0.05g/ml; (b) statistical plot of FAPbI<sub>3</sub> with MABr = 0, 0.03g/ml; (c) IPCE spectra obtained for the devices with and without MABr; (d) the device performance test at 80 °C in ambient air (relative humidity of 60) for 1000 seconds.

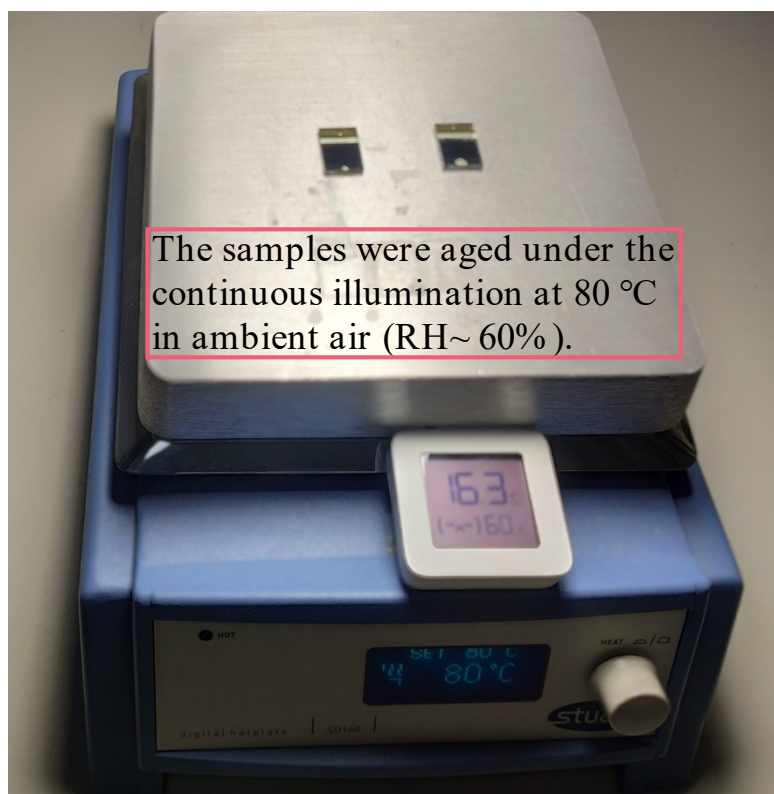

Supplementary Fig. 10. Stability test at 80 °C in ambient air (relatively humidity of 60 %) for 1000 seconds

Table S1 Performance parameters of PSCs with various MABr concentration.

| MABr concentration | $J_{SC}$ (mA cm <sup>-2</sup> ) | $V_{OC}$ (V) | FF (%) | PCE (%) |
|--------------------|---------------------------------|--------------|--------|---------|
| 0                  | 23.95                           | 1.12         | 74.95  | 20.05   |
| 0.01               | 23.76                           | 1.12         | 77.11  | 20.51   |
| 0.02               | 23.98                           | 1.12         | 78.58  | 21.11   |
| 0.03               | 25.30                           | 1.15         | 77.84  | 22.64   |
| 0.04               | 25.14                           | 1.14         | 77.38  | 22.23   |
| 0.05               | 24.45                           | 1.15         | 75.01  | 21.08   |

Table S2. Fitted EIS parameters for the PSCs based on pristine FAPbI<sub>3</sub> and MABr modified FAPbI<sub>3</sub> ETLS.

| ETL                     | $R_s$ | $R_{tr}$ | $C_{tr}$            | $R_{rec}$ | $C_{rec}$           |
|-------------------------|-------|----------|---------------------|-----------|---------------------|
| FAPbI <sub>3</sub>      | 9.8   | 58.28    | $1.3 \cdot 10^{-7}$ | 49.4      | $1.1 \cdot 10^{-7}$ |
| MABr-FAPbI <sub>3</sub> | 7.1   | 9.8      | $1.1 \cdot 10^{-6}$ | 58.3      | $2.4 \cdot 10^{-7}$ |
